# Supplementary material for: Evidence for habitat fragmentation induced genetic degradation in remnant Syzygium maire (Myrtaceae) populations
Source: Research Square preprint supplement (doi:10.21203/rs.3.rs-8283695/v1), 2026-01-12
Supplement: Supplementary file 1 [file 2d4d770b8150cf94b86b051c.docx]

Supplementary tables

**Table S1: Sample number by subregion, site and age class, including dominant land cover.**

| **Subregion** | **Total** | **Site** | **Est. pop. size** | **Adults** | **Seedlings** | **NZLCDB landform and surrounds** |
| --- | --- | --- | --- | --- | --- | --- |
| Wairarapa | 41 | Allen/Lowe’s Bush (ALB) | 50-100 | 20 | 24 | Broadleaved Indigenous Hardwoods/High Producing Exotic Grassland/Herbaceous Freshwater Vegetation |
|  |  | Carter Scenic Reserve (CSR) | <10 | 1 |  | Herbaceous Freshwater Vegetation/Indigenous Forest/Mānuka and/or Kānuka/High Producing Exotic Grassland/Gorse and/or Broom/Deciduous Hardwoods |
|  |  | Fensham Reserve (FHR) | <50 | 15 | 16 | Indigenous forest/High Producing Exotic Grassland/Mānuka and/or Kānuka |
|  |  | Mclean’s property (PMP) | 5 | 5 |  | Mānuka and/or Kānuka/Broadleaved Indigenous Hardwoods/High Producing Exotic Grassland |
| Hutt Valley | 35 | Gentian Park (GEP) | <50 | 16 | 32 | Broadleaved Indigenous Hardwoods/Built-up area/Gorse and/or Broom |
|  |  | Kaitoke Regional Park (KTK) | <10 | 3 |  | Indigenous Forest/Broadleaved Indigenous Hardwoods |
|  |  | Te Haukāretu Park (THP) | <10 | 6 | 2 | Urban Parkland/Open Space/Lake or Pond/Built-up Area/River |
|  |  | Sylvan Way (SYL) | 10 | 10 |  | Broadleaved Indigenous Hardwoods/Built-up Area/Exotic Forest/Indigenous Forest/Gorse and/or Broom/ |
| Kāpiti Coast | 22 | Ngā Manu/Parkwood (NMP) | <50 | 14 |  | Indigenous Forest/Built-up Area/High Producing Exotic Grassland/Herbaceous Fresh Water Vegetation/Broadleaved Indigenous Hardwoods/Urban Parkland/Open Space |
|  |  | Silverlea (SLV) | <30 | 8 |  | Indigenous Forest/High Producing Exotic Grassland/Mānuka and/or Kānuka |
| Wellington | 13 | Zealandia (ZLD) | <30 | 13 |  | Indigenous Forest/Built-up Area/Broadleaved Indigenous Hardwoods/Exotic Forest/Lake or Pond |

NZLCDB = New Zealand Landcover Database

**Table S2: Variant calling statistics for SNPs according to varying MAF (minor allele frequency) and LD (linkage disequilibrium).**

|  | **MAF** | **% missing data allowed** | **Dataset** | **SNPs** | **SNPs/KB** |
| --- | --- | --- | --- | --- | --- |
| Raw | NA | NA | all | 2,438,953 | 6.10 |
| MAF0.00 | 0.00 | 10 | all | 1,257,304 | 3.14 |
| MAF0.00_LD | 0.00 | 10 | all | 586,843 | 1.47 |
| MAF0.00_nomiss_LD | 0.00 | 0 | all | 178,858 | 0.45 |
| MAF0.00_nomiss_LD | 0.00 | 0 | Adults | 171,172 | 0.43 |
| MAF0.00_nomiss_LD | 0.00 | 0 | AvS | 156,672 | 0.39 |
| MAF0.05 | 0.05 | 10 | all | 648,340 | 1.62 |
| MAF0.05_LD | 0.05 | 10 | all | 179,994 | 0.45 |
| MAF0.05_nomiss_LD | 0.05 | 0 | all | 55,709 | 0.14 |
| MAF0.05_nomiss_LD | 0.05 | 0 | Adults | 55,708 | 0.14 |
| MAF0.05_nomiss_LD | 0.05 | 0 | AvS | 53,633 | 0.13 |

All = all adults and seedlings

Adults = only adults

AvS = All samples at sites where seedlings were collected

**Table S3: Adult site level heterozygosity and standard deviations (SD) for all sites in the Greater Wellington Region**

| **Site** | **polyLoc** | **monoLoc** | **Ho** | **HoSD** | **He** | **HeSD** | **uHe** | **uHeSD** | **Median beta-diversity** | **Mean beta-diversity** |
| --- | --- | --- | --- | --- | --- | --- | --- | --- | --- | --- |
| ALB | 48564 | 5068 | 0.24 | 0.18 | 0.23 | 0.16 | 0.24 | 0.16 | 0.18 | 0.24 |
| FHR | 47557 | 6075 | 0.24 | 0.19 | 0.23 | 0.16 | 0.24 | 0.17 | 0.24 | 0.24 |
| GEP | 46028 | 7604 | 0.24 | 0.21 | 0.22 | 0.17 | 0.23 | 0.17 | 0.18 | 0.23 |
| KTK | 19117 | 34515 | 0.16 | 0.25 | 0.12 | 0.17 | 0.15 | 0.21 | 0.00 | 0.15 |
| NGP | 46986 | 6646 | 0.25 | 0.20 | 0.24 | 0.17 | 0.25 | 0.17 | 0.20 | 0.25 |
| PMP | 18184 | 35448 | 0.14 | 0.24 | 0.10 | 0.16 | 0.11 | 0.18 | 0.00 | 0.11 |
| SLV | 38736 | 14896 | 0.23 | 0.22 | 0.21 | 0.18 | 0.22 | 0.19 | 0.23 | 0.22 |
| SYL | 41023 | 12609 | 0.22 | 0.21 | 0.21 | 0.17 | 0.23 | 0.18 | 0.19 | 0.23 |
| THP | 36927 | 16705 | 0.25 | 0.25 | 0.21 | 0.18 | 0.23 | 0.20 | 0.17 | 0.23 |
| ZLD | 40127 | 13505 | 0.22 | 0.21 | 0.21 | 0.17 | 0.22 | 0.18 | 0.21 | 0.22 |

polyLoc = polymorphic loci

monoLoc = monomorphic loci

Ho = observed heterozygosity

He = expected heterozygosity

uHe = unbiased expected heterozygosity

**Table S4: Pairwise FST and confidence intervals (CI) for adult trees at all sites in the Greater Wellington Region**

| **Population Pair** | **2.5% CI** | **FST** | **97.5% CI** |
| --- | --- | --- | --- |
| NGP - SLV | 0.04 | 0.04 | 0.04 |
| ALB - FHR | 0.05 | 0.05 | 0.05 |
| FHR - NGP | 0.07 | 0.08 | 0.08 |
| FHR - SYL | 0.08 | 0.08 | 0.08 |
| NGP - SYL | 0.09 | 0.09 | 0.09 |
| ALB - NGP | 0.09 | 0.09 | 0.09 |
| FHR - THP | 0.1 | 0.1 | 0.1 |
| NGP - THP | 0.1 | 0.1 | 0.1 |
| GEP - SYL | 0.1 | 0.1 | 0.1 |
| SYL - THP | 0.1 | 0.11 | 0.11 |
| GEP - NGP | 0.11 | 0.11 | 0.11 |
| ALB - SYL | 0.11 | 0.11 | 0.11 |
| FHR - SLV | 0.11 | 0.11 | 0.11 |
| FHR - GEP | 0.11 | 0.11 | 0.12 |
| ALB - SLV | 0.11 | 0.12 | 0.12 |
| SLV - SYL | 0.12 | 0.12 | 0.12 |
| GEP - THP | 0.12 | 0.12 | 0.12 |
| ALB - THP | 0.12 | 0.12 | 0.12 |
| NGP - ZLD | 0.12 | 0.12 | 0.12 |
| FHR - ZLD | 0.12 | 0.12 | 0.12 |
| GEP - SLV | 0.12 | 0.13 | 0.13 |
| ALB - GEP | 0.13 | 0.13 | 0.13 |
| SYL - ZLD | 0.13 | 0.13 | 0.14 |
| SLV - THP | 0.13 | 0.14 | 0.14 |
| THP - ZLD | 0.14 | 0.14 | 0.15 |
| GEP - ZLD | 0.15 | 0.15 | 0.15 |
| ALB - ZLD | 0.15 | 0.15 | 0.16 |
| SLV - ZLD | 0.15 | 0.16 | 0.16 |
| KTK - NGP | 0.2 | 0.2 | 0.2 |
| GEP - KTK | 0.21 | 0.22 | 0.22 |
| ALB - KTK | 0.21 | 0.22 | 0.22 |
| FHR - KTK | 0.22 | 0.22 | 0.22 |
| FHR - PMP | 0.22 | 0.22 | 0.22 |
| KTK - SYL | 0.22 | 0.22 | 0.22 |
| KTK - THP | 0.22 | 0.22 | 0.23 |
| ALB - PMP | 0.22 | 0.23 | 0.23 |
| KTK - SLV | 0.24 | 0.24 | 0.25 |
| NGP - PMP | 0.27 | 0.27 | 0.28 |
| KTK - ZLD | 0.27 | 0.28 | 0.28 |
| GEP - PMP | 0.29 | 0.29 | 0.3 |
| PMP - SYL | 0.3 | 0.3 | 0.3 |
| PMP - ZLD | 0.3 | 0.31 | 0.31 |
| PMP - THP | 0.31 | 0.32 | 0.32 |
| PMP - SLV | 0.33 | 0.34 | 0.34 |
| KTK - PMP | 0.51 | 0.51 | 0.52 |

**Table S5: Test for isolation by distance across Waipoua using the Mantel test statistic (r).**

| **Comparison** | **r (Mantel statistic)** | **p-value** | **Upper quantiles of permutations** | | | |
| --- | --- | --- | --- | --- | --- | --- |
|  |  |  | **90%** | **95%** | **97.5%** | **99%** |
| Between sites | 0.20 | 0.22 | 0.42 | 0.54 | 0.63 | 0.70 |
| Between individuals | 0.25 | 0.0008 | 0.08 | 0.11 | 0.13 | 0.16 |

IBD was tested at two levels: between sites and between all individuals. Geographic distances were based on Euclidian distance in meters, while genetic distance was FST for subregions and sites and proportion shared alleles for indiivduals. Significance was tested for 99999 permutations.

**Table S6: Spatial autocorrelation across Greater Wellington.**

| **Bin (meters)** | **N** | **r** | **L.r** | **U.r** | **L.r.null** | **U.r.null** | **p-value** |
| --- | --- | --- | --- | --- | --- | --- | --- |
| 9997 | 1179 | 0.0702 | 0.0649 | 0.0757 | -0.0025 | 0.0030 | 0.0000 |
| 19994 | 445 | 0.0090 | 0.0068 | 0.0112 | -0.0048 | 0.0047 | 0.0000 |
| 29991 | 139 | 0.0035 | -0.0014 | 0.0082 | -0.0080 | 0.0090 | 0.2010 |
| 39988 | 891 | -0.0152 | -0.0166 | -0.0137 | -0.0034 | 0.0030 | 0.0000 |
| 49985 | 979 | -0.0213 | -0.0229 | -0.0199 | -0.0031 | 0.0032 | 0.0000 |
| 59982 | 792 | -0.0246 | -0.0262 | -0.0230 | -0.0037 | 0.0036 | 0.0000 |
| 69979 | 965 | -0.0162 | -0.0176 | -0.0148 | -0.0030 | 0.0029 | 0.0000 |
| 79976 | 182 | -0.0115 | -0.0148 | -0.0078 | -0.0072 | 0.0075 | 0.0050 |
| 89973 | 65 | -0.0254 | -0.0290 | -0.0219 | -0.0129 | 0.0147 | 0.0000 |
| 104571.4 | 468 | -0.0284 | -0.0303 | -0.0263 | -0.0042 | 0.0039 | 0.0000 |

Autocorrelation coefficient (r) was calculated with 1000 *permutations* to give upper (U.r) lower (L.r) bounds.

N = number of pairwise comparisons per distance class

null = values for the null hypothesis of no autocorrelation

**Table S7: Spatial autocorrelation across Waipoua.**

| **Bin (meters)** | **N** | **r** | **L.r** | **U.r** | **L.r.null** | **U.r.null** | **p-value** |
| --- | --- | --- | --- | --- | --- | --- | --- |
| 998.5 | 96 | 0.029 | 0.019 | 0.043 | -0.005 | 0.008 | 0.000 |
| 1997 | 18 | 0.006 | -0.007 | 0.018 | -0.010 | 0.023 | 0.151 |
| 2995.5 | 4 | -0.003 | NA | NA | -0.021 | 0.033 | 0.425 |
| 3994 | 10 | -0.001 | -0.009 | 0.009 | -0.014 | 0.030 | 0.558 |
| 4992.5 | 20 | -0.003 | -0.009 | 0.002 | -0.010 | 0.019 | 0.341 |
| 5991 | 7 | 0.006 | -0.001 | 0.013 | -0.016 | 0.035 | 0.186 |
| 6989.5 | 28 | 0.005 | -0.002 | 0.012 | -0.009 | 0.015 | 0.151 |
| 7988 | 49 | 0.004 | 0.000 | 0.009 | -0.007 | 0.009 | 0.130 |
| 8986.5 | 7 | 0.007 | -0.005 | 0.019 | -0.018 | 0.033 | 0.162 |
| 9985 | 39 | 0.004 | -0.012 | 0.036 | -0.008 | 0.011 | 0.176 |
| 10983.5 | 35 | -0.006 | -0.012 | 0.000 | -0.008 | 0.012 | 0.098 |
| 11982 | 91 | -0.008 | -0.012 | -0.005 | -0.005 | 0.006 | 0.001 |
| 12980.5 | 19 | 0.000 | -0.005 | 0.006 | -0.010 | 0.019 | 0.540 |
| 13979 | 78 | 0.002 | -0.002 | 0.005 | -0.006 | 0.007 | 0.250 |
| 14977.5 | 24 | 0.002 | -0.004 | 0.010 | -0.010 | 0.015 | 0.283 |
| 15976 | 53 | -0.008 | -0.012 | -0.003 | -0.007 | 0.009 | 0.014 |
| 16974.5 | 22 | -0.004 | -0.010 | 0.003 | -0.010 | 0.015 | 0.285 |
| 17973 | 43 | -0.005 | -0.011 | 0.000 | -0.007 | 0.011 | 0.101 |
| 18971.5 | 23 | -0.015 | -0.021 | -0.010 | -0.010 | 0.016 | 0.002 |
| 19970 | 19 | -0.019 | -0.023 | -0.014 | -0.010 | 0.018 | 0.000 |
| 20968.5 | 49 | -0.009 | -0.014 | -0.004 | -0.007 | 0.009 | 0.005 |
| 21967 | 2 | -0.002 | NA | NA | -0.027 | 0.031 | 0.510 |
| 22965.5 | 0 | Na | NA | NA | NA | NA | NA |
| 23964 | 12 | 0.003 | -0.004 | 0.011 | -0.013 | 0.022 | 0.243 |
| 24962.5 | 16 | -0.011 | -0.018 | -0.004 | -0.011 | 0.023 | 0.024 |
| 25961 | 5 | -0.018 | NA | NA | -0.020 | 0.029 | 0.041 |
| 26959.5 | 23 | -0.008 | -0.013 | -0.003 | -0.009 | 0.016 | 0.043 |
| 27958 | 0 | Na | NA | NA | NA | NA | NA |
| 28956.5 | 0 | Na | NA | NA | NA | NA | NA |
| 29955 | 0 | Na | NA | NA | NA | NA | NA |
| 31152.81 | 28 | -0.011 | -0.016 | -0.006 | -0.009 | 0.013 | 0.008 |

Autocorrelation coefficient (r) was calculated with 1000 *permutations* to give upper (U.r) lower (L.r) bounds.

N = number of pairwise comparisons per distance class

null = values for the null hypothesis of no autocorrelation

**Table S8: Pairwise private allele content and allele frequency difference (AFD) between all sites and age groups.**

| **Cohort** | **pop2** | **fixed** | **priv1** | **priv2** | **Chao1** | **Chao2** | **totalpriv** | **AFD** |
| --- | --- | --- | --- | --- | --- | --- | --- | --- |
| GEP_A | GEP_S | 0 | 974 | 4308 | 64 | 242 | 5282 | 0.048 |
| ALB_A | ALB_S | 0 | 1693 | 2435 | 90 | 152 | 4128 | 0.07 |
| FHR_A | FHR_S | 0 | 3311 | 2563 | 208 | 193 | 5874 | 0.072 |
| ALB_S | FHR_A | 0 | 4168 | 2419 | 279 | 123 | 6587 | 0.093 |
| ALB_A | FHR_A | 0 | 3929 | 2922 | 242 | 148 | 6851 | 0.1 |
| NGP_A | SLV_A | 0 | 10449 | 2199 | 497 | 161 | 12648 | 0.105 |
| ALB_S | FHR_S | 0 | 4824 | 2327 | 274 | 103 | 7151 | 0.109 |
| ALB_A | FHR_S | 0 | 4643 | 2888 | 272 | 163 | 7531 | 0.115 |
| ALB_S | NGP_A | 0 | 4767 | 2447 | 316 | 103 | 7214 | 0.116 |
| FHR_A | NGP_A | 0 | 4611 | 4040 | 295 | 236 | 8651 | 0.119 |
| ALB_A | NGP_A | 0 | 4518 | 2940 | 290 | 138 | 7458 | 0.121 |
| GEP_S | SYL_A | 0 | 10201 | 1862 | 485 | 67 | 12063 | 0.122 |
| GEP_A | SYL_A | 0 | 8624 | 3619 | 402 | 165 | 12243 | 0.124 |
| FHR_A | SYL_A | 0 | 10109 | 3575 | 464 | 187 | 13684 | 0.125 |
| FHR_S | NGP_A | 0 | 4586 | 4763 | 306 | 262 | 9349 | 0.127 |
| NGP_A | SYL_A | 0 | 9964 | 4001 | 415 | 195 | 13965 | 0.128 |
| ALB_S | SYL_A | 0 | 10575 | 2292 | 523 | 90 | 12867 | 0.13 |
| GEP_S | NGP_A | 0 | 5764 | 3388 | 319 | 123 | 9152 | 0.13 |
| FHR_A | GEP_S | 5 | 3504 | 5309 | 127 | 267 | 8813 | 0.131 |
| ALB_A | GEP_S | 0 | 3761 | 4559 | 166 | 213 | 8320 | 0.134 |
| ALB_A | SYL_A | 0 | 10600 | 3059 | 483 | 111 | 13659 | 0.134 |
| ALB_S | GEP_S | 0 | 3723 | 3779 | 161 | 146 | 7502 | 0.134 |
| GEP_A | NGP_A | 0 | 5364 | 6322 | 296 | 278 | 11686 | 0.134 |
| FHR_A | GEP_A | 1 | 6571 | 5042 | 302 | 265 | 11613 | 0.135 |
| ALB_S | SLV_A | 0 | 12296 | 1726 | 646 | 96 | 14022 | 0.136 |
| ALB_A | SLV_A | 0 | 11973 | 2145 | 595 | 107 | 14118 | 0.137 |
| FHR_S | SYL_A | 0 | 9920 | 4134 | 457 | 196 | 14054 | 0.137 |
| ALB_A | GEP_A | 0 | 6940 | 4404 | 333 | 202 | 11344 | 0.138 |
| ALB_S | GEP_A | 0 | 6970 | 3692 | 336 | 142 | 10662 | 0.138 |
| FHR_A | ZLD_A | 0 | 10788 | 3358 | 361 | 203 | 14146 | 0.138 |
| NGP_A | ZLD_A | 0 | 10639 | 3780 | 334 | 234 | 14419 | 0.138 |
| FHR_A | SLV_A | 0 | 11862 | 3041 | 532 | 138 | 14903 | 0.14 |
| GEP_S | SLV_A | 0 | 13168 | 2542 | 606 | 75 | 15710 | 0.14 |
| SYL_A | THP_A | 0 | 10255 | 6159 | 439 | 260 | 16414 | 0.14 |
| FHR_S | GEP_S | 1 | 3493 | 6046 | 126 | 281 | 9539 | 0.141 |
| SLV_A | SYL_A | 4 | 7031 | 9318 | 285 | 400 | 16349 | 0.141 |
| SYL_A | ZLD_A | 15 | 8221 | 7325 | 229 | 350 | 15546 | 0.141 |
| FHR_A | THP_A | 0 | 13642 | 3012 | 597 | 138 | 16654 | 0.142 |
| GEP_A | THP_A | 0 | 12580 | 3479 | 551 | 133 | 16059 | 0.142 |
| FHR_S | GEP_A | 0 | 6458 | 5677 | 282 | 258 | 12135 | 0.143 |
| FHR_S | ZLD_A | 8 | 10575 | 3893 | 365 | 222 | 14468 | 0.143 |
| GEP_A | SLV_A | 0 | 11944 | 4652 | 520 | 170 | 16596 | 0.143 |
| GEP_S | ZLD_A | 0 | 10972 | 1737 | 373 | 74 | 12709 | 0.143 |
| GEP_S | THP_A | 0 | 14098 | 1663 | 647 | 50 | 15761 | 0.143 |
| NGP_A | THP_A | 0 | 12993 | 2934 | 552 | 151 | 15927 | 0.143 |
| FHR_S | THP_A | 0 | 13240 | 3358 | 592 | 151 | 16598 | 0.144 |
| ALB_S | THP_A | 0 | 14288 | 1909 | 679 | 68 | 16197 | 0.146 |
| GEP_A | ZLD_A | 0 | 9803 | 3902 | 310 | 191 | 13705 | 0.146 |
| ALB_A | THP_A | 0 | 14059 | 2422 | 668 | 123 | 16481 | 0.147 |
| ALB_S | ZLD_A | 0 | 11518 | 2339 | 422 | 108 | 13857 | 0.147 |
| FHR_S | SLV_A | 0 | 11673 | 3600 | 559 | 180 | 15273 | 0.147 |
| ALB_A | ZLD_A | 0 | 11312 | 2875 | 380 | 129 | 14187 | 0.149 |
| THP_A | ZLD_A | 21 | 7576 | 10776 | 193 | 495 | 18352 | 0.152 |
| SLV_A | ZLD_A | 5 | 8153 | 9544 | 202 | 439 | 17697 | 0.153 |
| SLV_A | THP_A | 2 | 9584 | 7775 | 388 | 325 | 17359 | 0.154 |
| THP_A | THP_S | 0 | 23075 | 2168 | 466 | 114 | 25243 | 0.154 |
| ALB_S | PMP_A | 35 | 31664 | 542 | 787 | 31 | 32206 | 0.182 |
| ALB_A | PMP_A | 24 | 31041 | 661 | 759 | 64 | 31702 | 0.183 |
| FHR_A | PMP_A | 40 | 30541 | 1168 | 690 | 88 | 31709 | 0.184 |
| KTK_A | THP_A | 273 | 4292 | 22102 | 188 | 458 | 26394 | 0.188 |
| FHR_S | PMP_A | 70 | 29994 | 1369 | 680 | 93 | 31363 | 0.189 |
| KTK_A | SYL_A | 234 | 3164 | 25070 | 146 | 596 | 28234 | 0.189 |
| GEP_S | KTK_A | 126 | 31023 | 778 | 908 | 41 | 31801 | 0.19 |
| GEP_A | KTK_A | 226 | 28887 | 1976 | 781 | 93 | 30863 | 0.191 |
| KTK_A | SLV_A | 358 | 3869 | 23488 | 168 | 504 | 27357 | 0.195 |
| SYL_A | THP_S | 198 | 27445 | 2442 | 621 | 89 | 29887 | 0.195 |
| ALB_A | KTK_A | 136 | 30508 | 1061 | 885 | 65 | 31569 | 0.196 |
| GEP_A | THP_S | 114 | 31397 | 1389 | 830 | 61 | 32786 | 0.196 |
| FHR_A | THP_S | 126 | 32628 | 1091 | 864 | 54 | 33719 | 0.197 |
| KTK_A | NGP_A | 110 | 1525 | 29394 | 86 | 757 | 30919 | 0.197 |
| GEP_S | THP_S | 109 | 34045 | 703 | 973 | 24 | 34748 | 0.198 |
| ALB_A | THP_S | 189 | 33465 | 921 | 947 | 43 | 34386 | 0.2 |
| ALB_S | KTK_A | 149 | 31009 | 820 | 928 | 48 | 31829 | 0.2 |
| PMP_A | ZLD_A | 766 | 3213 | 25156 | 128 | 572 | 28369 | 0.201 |
| ALB_S | THP_S | 120 | 33994 | 708 | 997 | 34 | 34702 | 0.202 |
| NGP_A | THP_S | 147 | 32241 | 1275 | 838 | 87 | 33516 | 0.202 |
| PMP_A | THP_A | 522 | 5436 | 24179 | 240 | 384 | 29615 | 0.202 |
| PMP_A | SYL_A | 305 | 3629 | 26468 | 182 | 507 | 30097 | 0.202 |
| SLV_A | THP_S | 437 | 26012 | 3296 | 541 | 122 | 29308 | 0.202 |
| FHR_A | KTK_A | 195 | 29975 | 1535 | 811 | 87 | 31510 | 0.203 |
| FHR_S | THP_S | 339 | 32269 | 1480 | 860 | 69 | 33749 | 0.203 |
| GEP_S | PMP_A | 144 | 31927 | 749 | 777 | 37 | 32676 | 0.204 |
| GEP_A | PMP_A | 212 | 29798 | 1954 | 670 | 108 | 31752 | 0.205 |
| FHR_S | KTK_A | 253 | 29324 | 1632 | 772 | 60 | 30956 | 0.207 |
| KTK_A | ZLD_A | 622 | 4227 | 25237 | 114 | 686 | 29464 | 0.21 |
| NGP_A | PMP_A | 165 | 30550 | 1748 | 666 | 121 | 32298 | 0.21 |
| THP_S | ZLD_A | 721 | 3769 | 27876 | 75 | 728 | 31645 | 0.21 |
| KTK_A | THP_S | 2766 | 14491 | 11394 | 259 | 178 | 25885 | 0.211 |
| PMP_A | SLV_A | 443 | 4833 | 25385 | 214 | 425 | 30218 | 0.212 |
| KTK_A | PMP_A | 3389 | 14609 | 13676 | 215 | 340 | 28285 | 0.215 |
| CSR_A | SLV_A | 555 | 1921 | 32630 | 78 | 591 | 34551 | 0.22 |
| PMP_A | THP_S | 3892 | 15422 | 13258 | 342 | 135 | 28680 | 0.222 |
| CSR_A | NGP_A | 86 | 570 | 39529 | 25 | 873 | 40099 | 0.228 |
| CSR_A | KTK_A | 4205 | 8178 | 19268 | 103 | 279 | 27446 | 0.234 |
| CSR_A | SYL_A | 819 | 2291 | 35287 | 72 | 697 | 37578 | 0.234 |
| ALB_A | CSR_A | 222 | 40983 | 446 | 1012 | 14 | 41429 | 0.236 |
| ALB_S | CSR_A | 219 | 41737 | 458 | 1068 | 10 | 42195 | 0.239 |
| CSR_A | ZLD_A | 1438 | 2875 | 34975 | 49 | 799 | 37850 | 0.241 |
| CSR_A | THP_S | 5097 | 10007 | 18000 | 118 | 212 | 28007 | 0.244 |
| CSR_A | GEP_S | 424 | 775 | 42110 | 17 | 1059 | 42885 | 0.244 |
| CSR_A | GEP_A | 586 | 1521 | 39522 | 44 | 908 | 41043 | 0.246 |
| CSR_A | THP_A | 851 | 2838 | 31738 | 66 | 509 | 34576 | 0.247 |
| CSR_A | FHR_A | 369 | 944 | 40474 | 38 | 943 | 41418 | 0.248 |
| CSR_A | FHR_S | 512 | 1208 | 39990 | 59 | 945 | 41198 | 0.252 |
| CSR_A | PMP_A | 7113 | 11457 | 21614 | 111 | 413 | 33071 | 0.265 |

A = adults, S = seedlings.

**Table S9: Private alleles and allelic frequency difference (AFD) per site and age group compared to all other sites pooled.**

| **Cohort** | **pop2** | **N1** | **N2** | **fixed** | **priv1** | **priv2** | **totalpriv** | **AFD** |
| --- | --- | --- | --- | --- | --- | --- | --- | --- |
| ALB_A | Rest | 20 | 166 | 0 | 0 | 5069 | 5069 | 0.089 |
| ALB_S | Rest | 25 | 161 | 0 | 0 | 4327 | 4327 | 0.086 |
| CSR_A | Rest | 1 | 185 | 0 | 0 | 45606 | 45606 | 0.239 |
| FHR_A | Rest | 15 | 171 | 0 | 0 | 6076 | 6076 | 0.082 |
| FHR_S | Rest | 16 | 170 | 0 | 0 | 6824 | 6824 | 0.097 |
| GEP_A | Rest | 16 | 170 | 0 | 0 | 7605 | 7605 | 0.096 |
| GEP_S | Rest | 32 | 154 | 0 | 0 | 4271 | 4271 | 0.099 |
| KTK_A | Rest | 3 | 183 | 0 | 0 | 34516 | 34516 | 0.191 |
| NGP_A | Rest | 14 | 172 | 0 | 0 | 6647 | 6647 | 0.095 |
| PMP_A | Rest | 5 | 181 | 0 | 0 | 35449 | 35449 | 0.191 |
| SLV_A | Rest | 8 | 178 | 0 | 0 | 14897 | 14897 | 0.115 |
| SYL_A | Rest | 10 | 176 | 0 | 0 | 12610 | 12610 | 0.104 |
| THP_A | Rest | 6 | 180 | 0 | 0 | 16706 | 16706 | 0.121 |
| THP_S | Rest | 2 | 184 | 0 | 0 | 37613 | 37613 | 0.191 |
| ZLD | Rest | 13 | 173 | 0 | 0 | 13506 | 13506 | 0.123 |

**Table S10: Pairwise comparisons in expected heterozygosity difference (He_diff), allelic content and allele frequency difference (AFD) across sites and age groups where seedlings were collected.**

| **Cohort 1** | **Cohort 2** | **He_diff** | **He_diff significance** | **fixed_alleles** | **priv1 alleles** | **priv2 alleles** | **Tot_priv alleles** | **AFD** |
| --- | --- | --- | --- | --- | --- | --- | --- | --- |
| ALB_A | ALB_S | 0.000905 | sig @0.05 | 0 | 1693 | 2435 | 4128 | 0.07 |
| ALB_A | FHR_A | -0.003631 | sig @0.001 | 0 | 3929 | 2922 | 6851 | 0.1 |
| ALB_A | FHR_S | 0.000673 | non-sig @0.05 | 0 | 4643 | 2888 | 7531 | 0.115 |
| ALB_A | GEP_S | 0.009561 | sig @0.001 | 0 | 3761 | 4559 | 8320 | 0.134 |
| ALB_A | GEP_A | 0.008259 | sig @0.001 | 0 | 6940 | 4404 | 11344 | 0.138 |
| ALB_A | THP_A | 0.016705 | sig @0.001 | 0 | 14059 | 2422 | 16481 | 0.147 |
| ALB_A | THP_S | 0.105889 | sig @0.001 | 189 | 33465 | 921 | 34386 | 0.2 |
| ALB_S | FHR_A | -0.004536 | sig @0.001 | 0 | 4168 | 2419 | 6587 | 0.093 |
| ALB_S | FHR_S | -0.000232 | non-sig @0.05 | 0 | 4824 | 2327 | 7151 | 0.109 |
| ALB_S | GEP_S | 0.008656 | sig @0.001 | 0 | 3723 | 3779 | 7502 | 0.134 |
| ALB_S | GEP_A | 0.007354 | sig @0.001 | 0 | 6970 | 3692 | 10662 | 0.138 |
| ALB_S | THP_A | 0.0158 | sig @0.001 | 0 | 14288 | 1909 | 16197 | 0.146 |
| ALB_S | THP_S | 0.104984 | sig @0.001 | 120 | 33994 | 708 | 34702 | 0.202 |
| FHR_A | FHR_S | 0.004304 | sig @0.001 | 0 | 3311 | 2563 | 5874 | 0.072 |
| FHR_A | GEP_S | 0.013192 | sig @0.001 | 5 | 3504 | 5309 | 8813 | 0.131 |
| FHR_A | GEP_A | 0.01189 | sig @0.001 | 1 | 6571 | 5042 | 11613 | 0.135 |
| FHR_A | THP_A | 0.020336 | sig @0.001 | 0 | 13642 | 3012 | 16654 | 0.142 |
| FHR_A | THP_S | 0.10952 | sig @0.001 | 126 | 32628 | 1091 | 33719 | 0.197 |
| FHR_S | GEP_S | 0.008888 | sig @0.001 | 1 | 3493 | 6046 | 9539 | 0.141 |
| FHR_S | GEP_A | 0.007586 | sig @0.001 | 0 | 6458 | 5677 | 12135 | 0.143 |
| FHR_S | THP_A | 0.016032 | sig @0.001 | 0 | 13240 | 3358 | 16598 | 0.144 |
| FHR_S | THP_S | 0.105216 | sig @0.001 | 339 | 32269 | 1480 | 33749 | 0.203 |
| GEP_A | GEP_S | 0.001302 | sig @0.001 | 0 | 974 | 4308 | 5282 | 0.048 |
| GEP_A | THP_A | 0.008446 | sig @0.001 | 0 | 12580 | 3479 | 16059 | 0.142 |
| GEP_A | THP_S | 0.09763 | sig @0.001 | 114 | 31397 | 1389 | 32786 | 0.196 |
| GEP_S | THP_A | 0.007144 | sig @0.001 | 0 | 14098 | 1663 | 15761 | 0.143 |
| GEP_S | THP_S | 0.096328 | sig @0.001 | 109 | 34045 | 703 | 34748 | 0.198 |
| THP_A | THP_S | 0.089184 | sig @0.001 | 0 | 23075 | 2168 | 25243 | 0.154 |

**Table S11: Adult and seedling site level heterozygosity and standard deviations (SD) and inbreeding for all sites where seedlings were collected.**

| **Cohort** | **polyLoc** | **monoLoc** | **Ho** | **HoSD** | **He** | **HeSD** | **uHe** | **uHeSD** | **Average individual FIS** |
| --- | --- | --- | --- | --- | --- | --- | --- | --- | --- |
| ALB_A | 48564 | 5053 | 0.24 | 0.18 | 0.23 | 0.16 | 0.24 | 0.16 | 0.03 |
| ALB_S | 49306 | 4311 | 0.21 | 0.17 | 0.23 | 0.16 | 0.23 | 0.16 | 0.06 |
| FHR_A | 47557 | 6060 | 0.24 | 0.19 | 0.23 | 0.16 | 0.24 | 0.17 | 0.01 |
| FHR_S | 46809 | 6808 | 0.21 | 0.19 | 0.23 | 0.16 | 0.24 | 0.17 | 0.02 |
| GEP_A | 46028 | 7589 | 0.24 | 0.21 | 0.22 | 0.17 | 0.23 | 0.17 | 0.12 |
| GEP_S | 49362 | 4255 | 0.19 | 0.17 | 0.22 | 0.16 | 0.22 | 0.16 | 0.14 |
| THP_A | 36927 | 16690 | 0.25 | 0.25 | 0.21 | 0.18 | 0.23 | 0.20 | 0.07 |
| THP_S | 16020 | 37597 | 0.19 | 0.32 | 0.12 | 0.19 | 0.17 | 0.26 | 0.30 |

polyLoc = polymorphic loci

monoLoc = monomorphic loci

Ho = observed heterozygosity

He = expected heterozygosity

uHe = unbiased expected heterozygosity

Supplementary figures

**Figure S1: Land cover types surrounding the remnant *S. maire* stands sampled on the Kāpiti Coast.** Red depicts extant wetland habitat. Information was derived from the New Zealand Landcover Database version 5 (LRIS), geographical borders from NZ Coastlines and Islands Polygons (LINZ) and Greater Wellington Regional Council.

**Figure S2: Land cover types surrounding the remnant *S. maire* stands sampled in Wellington City.** Red depicts extant wetland habitat. Information was derived from the New Zealand Landcover Database version 5 (LRIS), geographical borders from NZ Coastlines and Islands Polygons (LINZ) and Greater Wellington Regional Council.

**Figure S3: Land cover types surrounding the remnant *S. maire* stands sampled in the Hutt River Valley.** Red depicts extant wetland habitat. Information was derived from the New Zealand Landcover Database version 5 (LRIS), geographical borders from NZ Coastlines and Islands Polygons (LINZ) and Greater Wellington Regional Council.

**Figure S4: Land cover types surrounding the remnant *S. maire* stands sampled in the Wairarapa.** Red depicts extant wetland habitat. Information was derived from the New Zealand Landcover Database version 5 (LRIS), geographical borders from NZ Coastlines and Islands Polygons (LINZ) and Greater Wellington Regional Council.

*
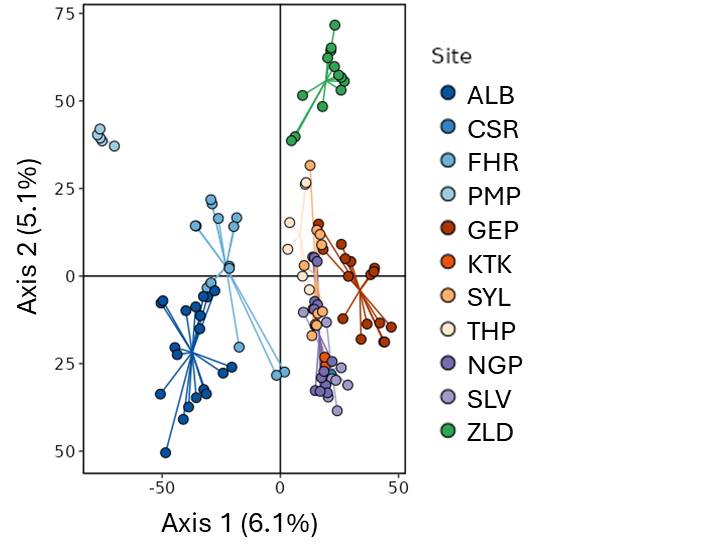
*

**Figure S5** **Principal component analysis for 111 reproductive age *S. maire* trees sampled in the Greater Wellington Region.** Analyses were based on 55,708 SNPs at a minor allele frequency of 0.05, filtered for linkage disequilibrium and without missing information. Individual points represent single trees coloured according to sampling sites. Points are coloured according to region, with tones according to sample site.


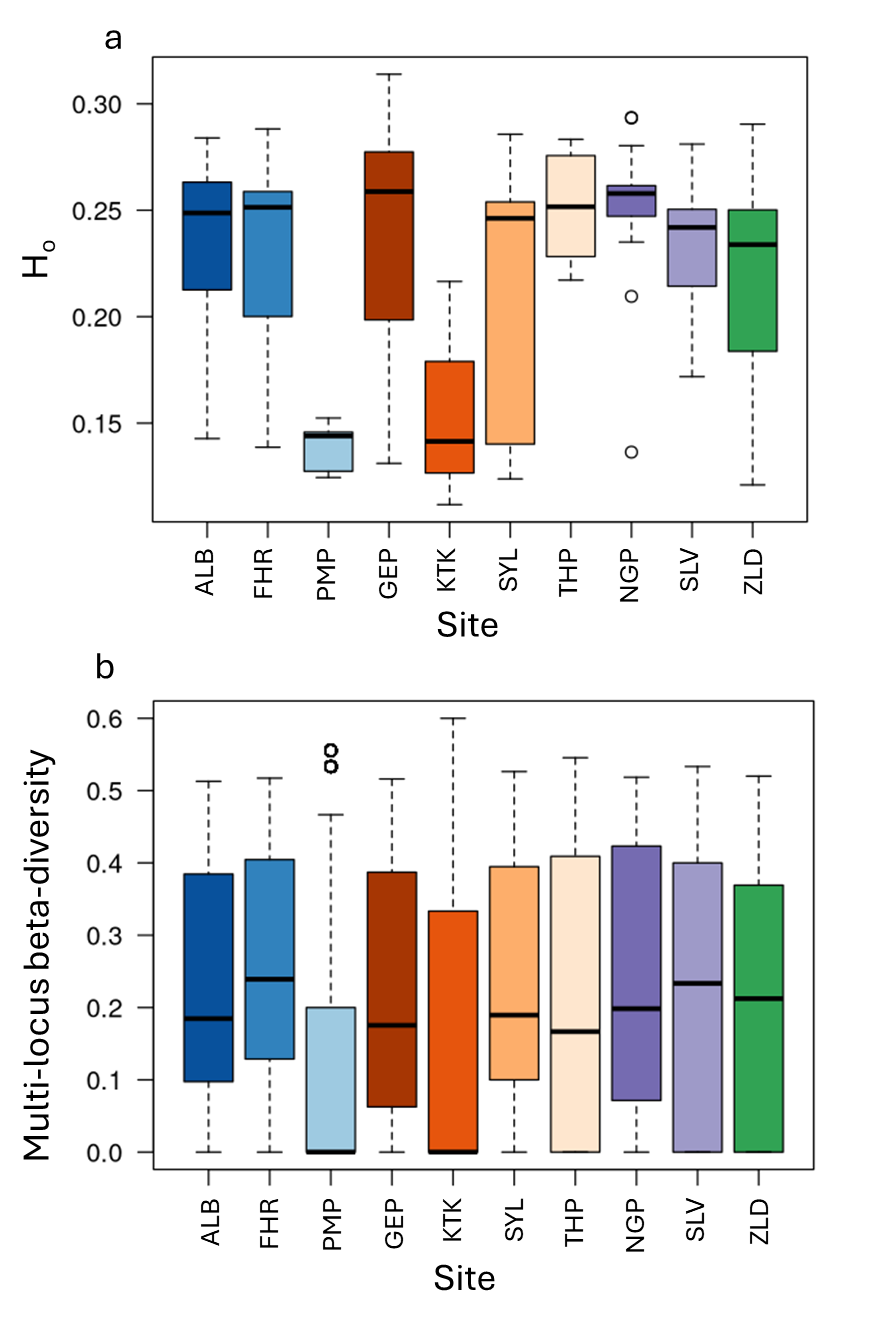


**Figure S6: Genetic diversity in adult trees per site.** A) Per-site distribution of individual observed heterozygosity (Ho). B) Beta diversity distribution across all loci per site.


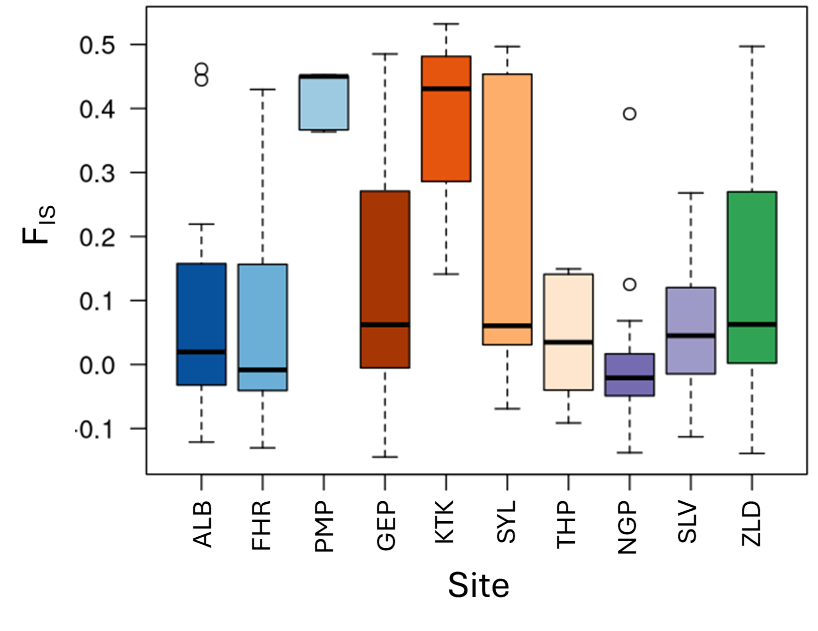


**Figure S7: The distribution of individual inbreeding values for each sampling site.**


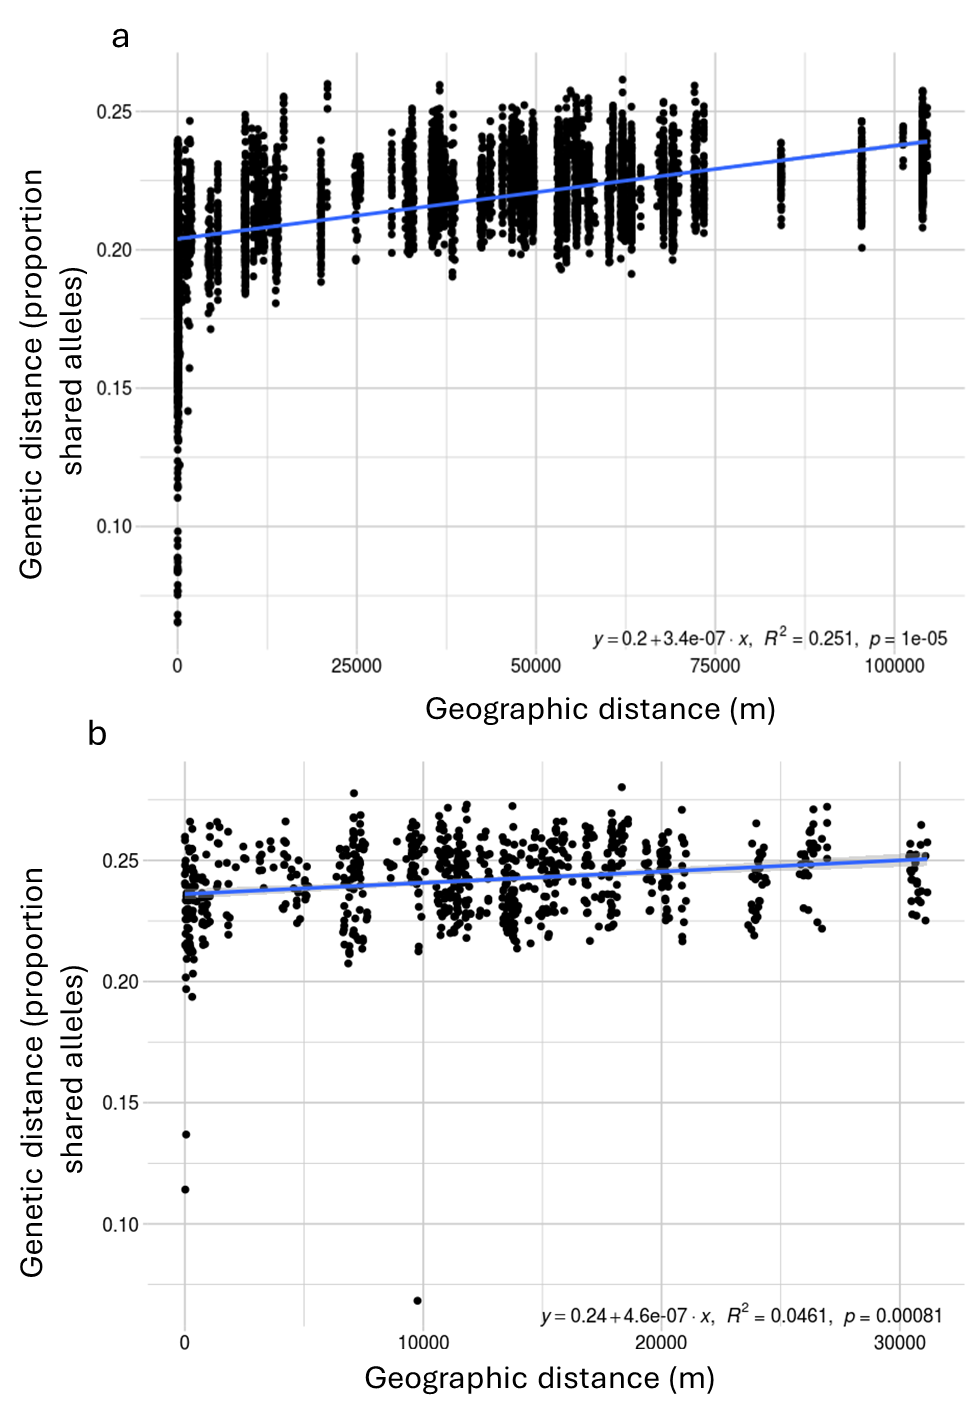


**Figure S8: Genetic versus geographic distance for adult trees across A) Greater Wellington and B) Waipoua.** Each point represents a pairwise comparison in genetic distance, based on pairwise shared alleles plotted according to pairwise Euclidean geographic distance in meters. The linear equation describing the trendline, correlation coefficient and p-value for the test of significant isolation by distance is shown in the bottom right corner.


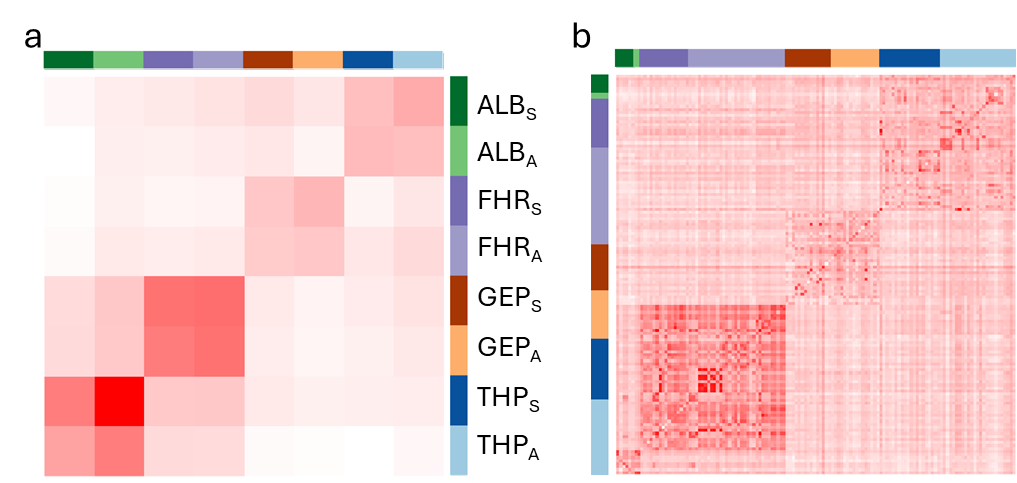


**Figure S9: Heatmaps representing kinship of A) adult and seedling cohorts across sampling sites and B) all individuals from the adult-seedling pair dataset.** Calculations were performed using Weir and Goudet (2017)’s beta-estimators and based on 156,672 SNPs filtered for linkage disequilibrium and missing information but not minor allele frequency. Inbreeding coefficients are displayed on the diagonal. Individuals are grouped into sites from which they were sampled, as depicted by multi-coloured bars alongside each heatmap.
